# Supplementary material
Source: publisher site journal article supplement (https://www.dovepress.com/article/210739)
Supplement: Supplementary file 1 [file get_supplementary_file.php]

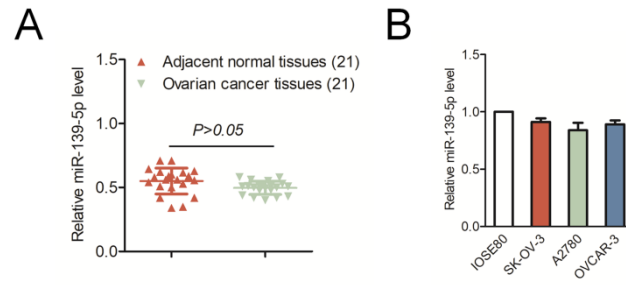

**Supplementary Figure 1. A.** The levels of miR-139-5p in ovarian cancer tissues and adjacent normal tissues were detected using qRT-PCR analysis. **B.** qRT-PCR analysis of miR-139-5p in OVCAR-3, SK-OV-3 and A2780, and normal ovarian epithelial cell, IOSE80.

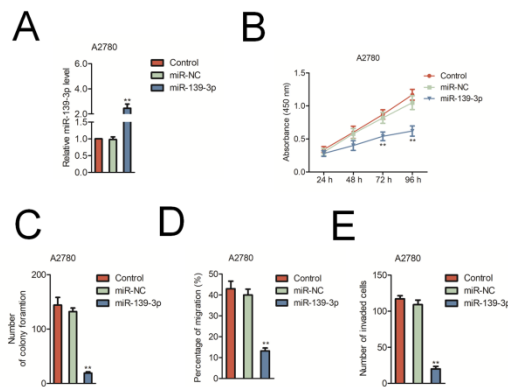

**Supplementary Figure 2.** MiR-139-3p inhibits A2780 cell proliferation, migration and invasion. **A.** qRT-PCR analysis of miR-139-3p expression in miR-139-3p or miR-NC transfected A2780 cells. **B.** CCK8 assay showing cell proliferation rates of miR-139-3p or miR-NC transfected A2780 cells. **C.** Estimation of colonies in A2780 cells stable expressing miR-139-3p or miR-NC. **D.** Wound healing assay showing migration of control and miR-139-3p overexpressing A2780 cells. **E.** Transwell assay showing invasiveness of control and miR-139-3p overexpressing A2780 cells. \*\*  $P < 0.01$  compared to control.

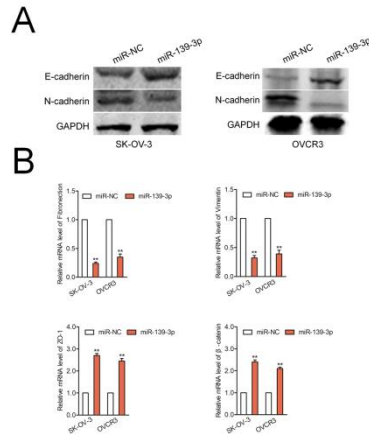

**Supplementary Figure 3.** miR-139-3p reverses the EMT process of ovarian cancer cell. **A.** SK-OV-3 and OVCAR3 cells were transfected with miR-NC or miR-139-3p and the expressions of N-cadherin and E-cadherin were detected using western blotting assay. **B.** The mRNA levels of epithelial markers (ZO-1 and β-catenin) and mesenchymal markers (Vimentin and Fibronectin) in SK-OV-3 and OVCAR3 cells were measured by qRT-PCR analysis. \*\* $P < 0.01$  compared with miR-NC.

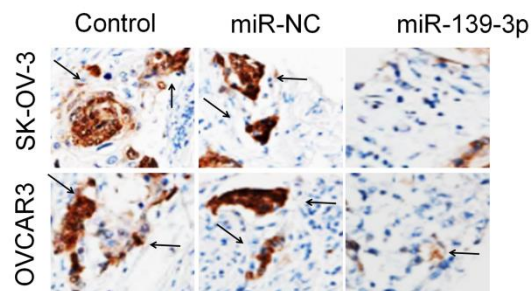

**Supplementary Figure 4.** The expression of ELAVL1 in lung tissue was detected using immunochemistry (IHC) staining.

**Supplementary Table 1.** Relationship between the expression of miR-139-3p and clinicopathological parameters in patients with ovarian cancer.

| Parameter                    | miR-139-3p |         | p-value |
|------------------------------|------------|---------|---------|
|                              | High (n)   | Low (n) |         |
| <b>Age (years)</b>           |            |         | 0.231   |
| <50                          | 7          | 6       |         |
| >50                          | 3          | 5       |         |
| <b>Tumor histology</b>       |            |         | 0.409   |
| Serous                       | 6          | 8       |         |
| Mucinous                     | 2          | 1       |         |
| Endometrioid                 | 3          | 1       |         |
| <b>FIGO stage</b>            |            |         | 0.02    |
| I                            | 2          | 7       |         |
| II                           | 1          | 6       |         |
| III                          | 2          | 3       |         |
| <b>Lymph node metastasis</b> |            |         | 0.005   |
| Yes                          | 4          | 9       |         |
| No                           | 5          | 3       |         |

FIGO: International Federation of Gynecology and Obstetrics
